# Supplementary material for: HuR protein attenuates miRNA-mediated repression by promoting miRISC dissociation from the target RNA
Source: PubMed Central journal article supplement — Nucleic Acids Res. 2012 Feb 23;40(11):5088–100. doi: 10.1093/nar/gks148 (PMC3367187; doi:10.1093/nar/gks148), 2012-02-23

## Supplementary Data

### Supplementary Tables

**Supplementary Table 1.** Primers used for construction of plasmids. F and R denote forward and reverse primers, respectively. Restriction sites present in primers are underlined.

| Primer No. | Primer Name           | Restriction Site | 5'→3' Sequence                                          |
|------------|-----------------------|------------------|---------------------------------------------------------|
| 1          | Ago2_F                | <i>NotI</i>      | CT <u>GCGGCCGC</u> ATGTA <sup>T</sup> CTCGGGAGCCGGCCC   |
| 2          | Ago2_R                | <i>EcoRI</i>     | CT <u>GAATTCT</u> CAAGCAAAGTACATGGTGCGC                 |
| 3          | His-HuR_F             | <i>NdeI</i>      | GATCG <u>CATATG</u> TCTAATGGTTATGAAGACC                 |
| 4          | His-HuR_R             | <i>XhoI</i>      | GATCG <u>CTCGAG</u> TTTGTGGGACTTGTTGGTTTTG              |
| 5          | His-HuR $\Delta$ H_R  | <i>XhoI</i>      | GATCG <u>CTCGAG</u> TTTGTGGGACTTGTTGGTTTTG              |
| 6          | His-HuR $\Delta$ 3_R  | <i>XhoI</i>      | GATCG <u>CTCGAG</u> GGGAGGAGGCGTTTCCTGGC                |
| 7          | His-HuR $\Delta$ H3_R | <i>XhoI</i>      | GATCG <u>CTCGAG</u> GGCTGCAA <sup>A</sup> CTTCACTGTGATG |
| 8          | ARD_F                 | <i>NotI</i>      | <u>GGCGGCCGC</u> GGGAGCTTTATTCTG                        |
| 9          | ARD_R                 | <i>NotI</i>      | <u>GGCGGCCGC</u> GCTGTCTTGACGG                          |

**Supplementary Table 2.** DNA oligonucleotides used for construction of templates for in vitro transcription

| Target RNA     | DNA oligomer | Sequence of DNA Oligonucleotides (5' → 3')                                                                                          |
|----------------|--------------|-------------------------------------------------------------------------------------------------------------------------------------|
|                | T7s          | TTAATACGACTCACTATAGGG                                                                                                               |
| HBS_20_MBSp    | antisense    | AGTGTAACGTTGAGGTAGTAGGTTGTATAGTCAATATCACTCTTTGG<br>AAATAATAAAACAAACAAACAAATAAATAAATAAATACCCTATAGTGA<br>GTCGTATTAA                   |
| ΔHBS_20_MBSp   | antisense    | AGTGTAACGTTGAGGTAGTAGGTTGTATAGTCAGTCTCACTCTTTGG<br>ACCTCCCTATAGTGAGTCGTATTAA                                                        |
| HBSMut_20_MBSp | antisense    | AGTGTAACGTTGAGGTAGTAGGTTGTATAGTCAGTCTCACTCTTTGG<br>ACCTAGTAGATACGCACATACGTATGCATGACATATATACCCTATAG<br>TGAGTCGTATTAA                 |
| HBS_50_MBSp    | sense        | TATTTATTTATTTATTTGTTTGTTTGTTTATTGCTGTACGAGAGAGTC<br>ACTGTGCTGATGTGGACTCAACATCTGATGAGCAACTATACAACCTA<br>CTACCTCAACGTTACACT           |
|                | antisense    | GTTGTATAGTTGCTCATCAGATGTTGAGTCCACATCAGCACAGTGAC<br>TCTCTCGTACAGCAATAAAACAAACAAACAAATAAATAAATAAATACC<br>CTATAGTGAGTCGTATTAA          |
|                | reverse      | AGTGTAACGTTGAGGTAGTAG                                                                                                               |
| HBS_50_MBSb    | sense        | TATTTATTTATTTATTTGTTTGTTTGTTTATTGCTGTACGAGAGAGTC<br>ACTGTGCTGATGTGGACTCAACATCTGATGAGCAACTGCACAGCCTA<br>TTGAACCTCAACGTTACACT         |
|                | antisense    | AATAGGCTGTGCAGTTGCTCATCAGATGTTGAGTCCACATCAGCACA<br>GTGACTCTCTCGTACAGCAATAAAACAAACAAACAAATAAATAAATAA<br>ATACCCTATAGTGAGTCGTATTAA     |
|                | reverse      | AGTGTAACGTTGAGGTAGTTC                                                                                                               |
| MBSb_50_HBS    | sense        | GGTCCAAAGAGTGACTGCACAGCCTATTGAACTACCTCAGCTGTAC<br>GAGAGAGTCACTGTGCTGATGTGGACTCAACATCTGATGAGCATATT<br>TATTTATTTATTTGTTTGTTTGTTTATTAC |
|                | antisense    | TAAATAAATATGCTCATCAGATGTTGAGTCCACATCAGCACAGTGAC<br>TCTCTCGTACAGCTGAGGTAGTTCAATAGGCTGTGCAGTCACTCTTT<br>GGACCCTATAGTGAGTCGTATTAA      |
|                | reverse      | GTAACGTAATAAAACAAACAAACAAATAAAA                                                                                                     |



**Supplementary Table 4.** Sequences of DNA and LNA oligonucleotides complementary to substrate spacer regions. The modified LNA nucleotides are shown in bold.

| oligonucleotide | Sequence (5'→3')                                   |
|-----------------|----------------------------------------------------|
| DNA 50          | TGCTCATCAGATGTTGAGTCCACATCAGCACAGTGACTCTCTCGTACAGC |
| LNA 27          | <b>CACATCAGCACAGTGACTCTCTCGTAC</b>                 |
| LNA 20          | <b>CAATATCACTCTTTGGAAAT</b>                        |

## Supplementary Figure Legends

**Figure S1.** miRISC specifically cleaves the target RNA bearing sequence perfectly complementary to let-7 miRNA . **(A)** Western blot analysis showing a similar level of purification for both let-7-enriched and non-let-7-enriched Ago2 miRISC (the latter purified from cells not co-transfected with plasmid expressing the pri-let-7 RNA). Input, extract before affinity purification; FT, flow-through fraction not retained on FLAG antibody beads; wash, fraction eluted with a buffer containing no FLAG peptide; elution, fraction eluted with 3xFLAG peptide. **(B)** Schematic representation of target RNAs, MBSp RNA and MutMBSp RNA. **(C and D)** MBSp RNA, but not MutMBSp RNA, is specifically cleaved by the let-7-enriched miRISC. Components added to cleavage reactions are indicated at the top. Cleavage product is indicated with arrow.

**Figure S2.** Representative assay of kinetics of the HBS\_20\_MBSp RNA cleavage catalyzed by the Ago2 miRISC. Quantification of cleavage reactions is shown in a lower panel.

**Figure S3.** Oligomerization potential of HuR and its mutants as determined by EMSA, using <sup>32</sup>P-labeled HBS\_50\_MBSp RNA as a substrate. Identity and concentration (nM) of proteins is indicated at the top of the gels.

**Figure S4.** Prehybridization of 20-mer LNA oligonucleotide complementary to the spacer interferes with the alleviating effect of HuR on the miRISC-catalyzed cleavage of HBS\_20\_MBSp. (Upper panels) Effect of increasing concentrations of HuR on cleavage of HBS\_20\_MBSp RNA alone or its duplex with a complementary LNA oligonucleotide. The schemes of HBS\_20\_MBSp RNA or its duplex with LNA oligonucleotide are shown above the gels. Inp, input RNA. (Lower panel) PhosphorImaging quantification of the experiment shown in the upper panel.

**Figure S5.** Immunoprecipitation (IP) experiments performed with HeLa cell extracts reveal no interaction between HuR and miRISC protein components

Ago2 and TNRC6B. **(A)** Extracts prepared from HeLa cells, either control (Fed) or starved (Starved) for amino acids for 2 h, were used for IP reactions with antibodies against endogenous Ago2 and HuR. **(B)** HeLa cells (Fed or Starved) expressing Myc-Ago2 and HA-tagged TNRC6B were used for IP reactions. Material immunoprecipitated with indicated antibodies was used for western blotting with  $\alpha$ -HuR,  $\alpha$ -HA,  $\alpha$ -Myc and  $\alpha$ -GFP antibodies. **(C)** HeLa cells were transfected with the HA-Ago3 expression plasmid. 24 h after transfection, the cytoplasmic extract prepared from cells, either control (Fed) or starved (Starved) for amino acids for 2 h, were used for IP reactions with  $\alpha$ -HA,  $\alpha$ -GFP or  $\alpha$ -HuR antibodies. The IP material was analyzed by western blotting for HA-Ago3 and endogenous HuR.  $\alpha$ -GFP antibody was used for control IP reactions.

## Supplementary Methods

### Immunoprecipitation from cellular extracts and Western analysis

HeLa cells were grown in monolayers in DMEM (Dulbecco's Modified Eagle's Medium) supplemented with 10% heat-inactivated FCS, 2 mM L-glutamine, 100 unit/ml penicillin, and 100 µg/ml streptomycin at 37°C in humidified atmosphere containing 5% CO<sub>2</sub>. Cells at high confluency (95%), cultured in 6-well plates DMEM without antibiotics supplemented with 10% heat-inactivated FCS, 2 mM L-glutamine, were transfected with 200 ng of indicated plasmids using Lipofectamine 2000 reagent (Invitrogen) according to the manufacturer's manual. Further assays were carried out 48 h after transfection, with splitting of cells and change of medium at 24 h. For stress induction experiments by amino acid starvation, cells at 50-60% confluency were grown for 2 h in DMEM without amino acids and supplemented with 10% FCS dialyzed against PBS. Cell extracts, from either transfected or non-transfected cells, were prepared by lysing the cells in IP buffer [25 mM Tris-HCl, pH 7.5, 150 mM KCl, 5 mM MgCl<sub>2</sub>, 1 mM DTT, 0.5% Triton X-100, 40 U/ml RNasin (Promega) and 1x EDTA-free protease inhibitor cocktail (Roche)] for 15 min on ice. Supernatants recovered after centrifugation at 14,000xg were used for IP. They were pre-cleared by incubation with pre-blocked [with 100 µg/ml of bovine serum albumine (BSA) in IP buffer] recombinant Protein G Agarose beads (Invitrogen) for 1 h prior to IP reactions. Mouse α-HuR (3A2, Santa Cruz), α-HA (3F10, Roche), α-Myc (9E10, Santa Cruz) or α-GFP (Roche) mAbs at 1:50 dilution, were used for IP reactions. The α-Ago2 mAb [2A8, kindly provided by Z. Mourelatos (67)] was used in 1:20 dilution. Protein G Agarose beads bound to antibodies (one hundredth of the lysate volume), were added to the lysates and IP reaction was carried out for 4 h at 4°C. The beads were centrifuged down, washed three times with IP buffer containing 200 mM KCl and used for Western blotting, using, a rabbit α-Ago2 antibodies (Abnova; 1:1,000 dilution), mouse α-HuR 3A2 (Santa Cruz), rat α-HA 3F10 (Roche), mouse α-Myc 9E10 (Santa Cruz), and mouse α-GFP (Roche) mAbs (all at 1:1,000 dilution), and HRP-conjugated secondary anti-mouse, anti-rabbit (both from GE Healthcare), and anti-rat (MP Biochemicals) antibodies (all at 1:10,000 dilution).

## Supplementary Reference

67. Nelson, P.T., De Planell-Saguer, M., Lamprinaki, S., Kiriakidou, M., Zhang, P., O'Doherty, U. and Mourelatos, Z. (2007) A novel monoclonal antibody against human Argonaute proteins reveals unexpected characteristics of miRNAs in human blood cells. *RNA*, **13**, 1787-1792.



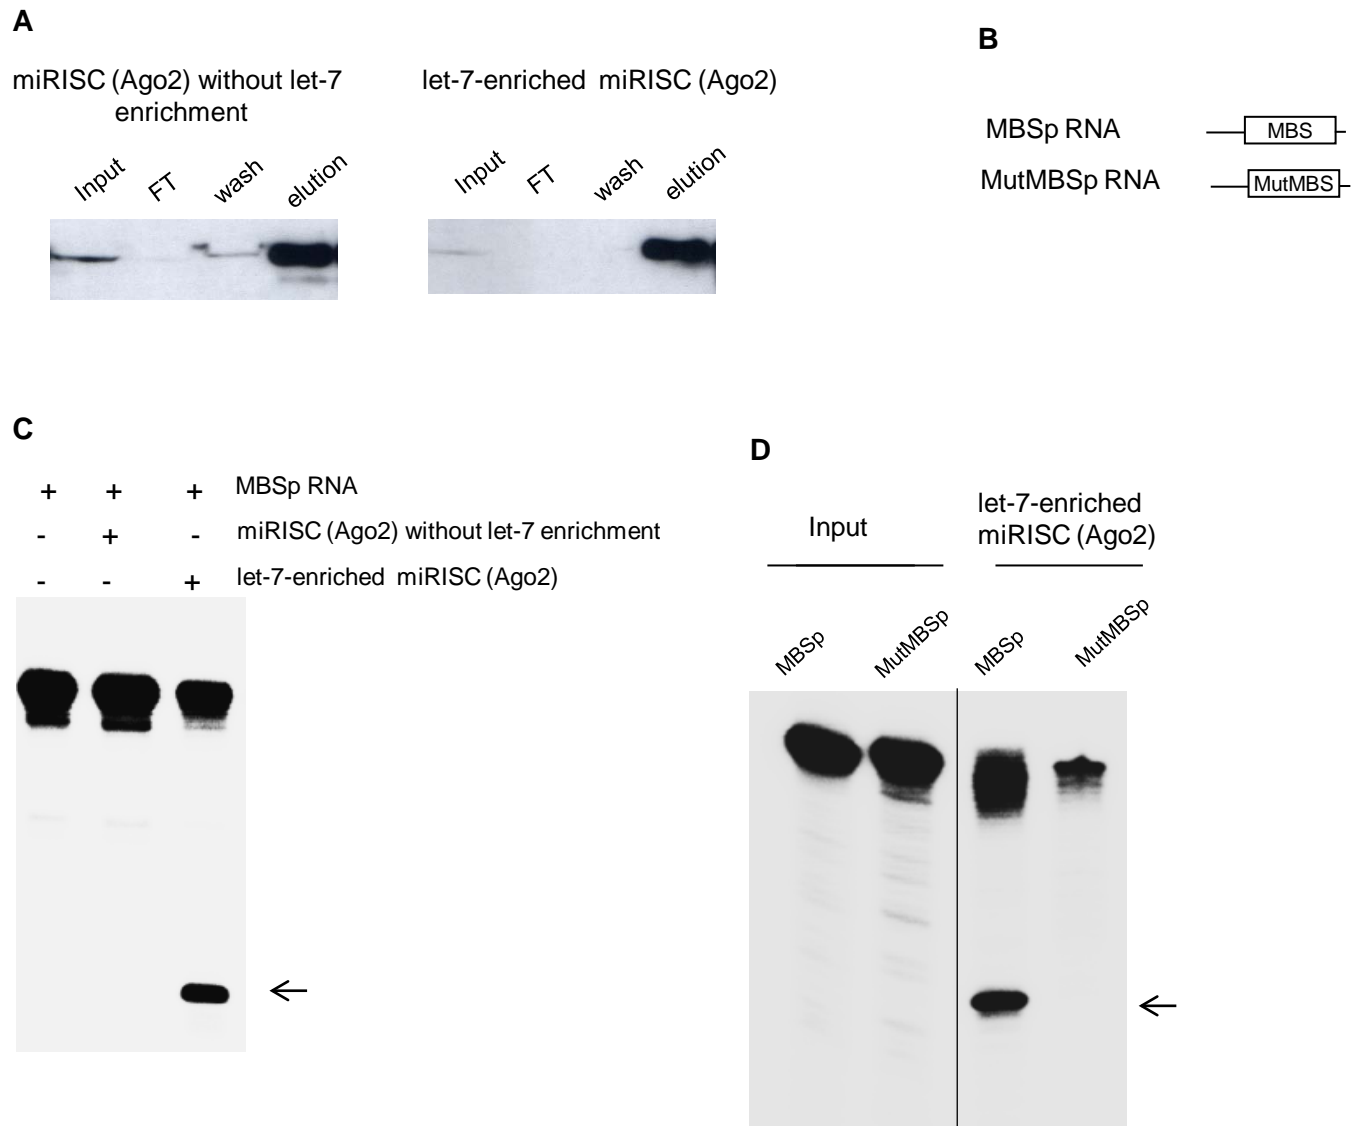

Supplementary Figure S1

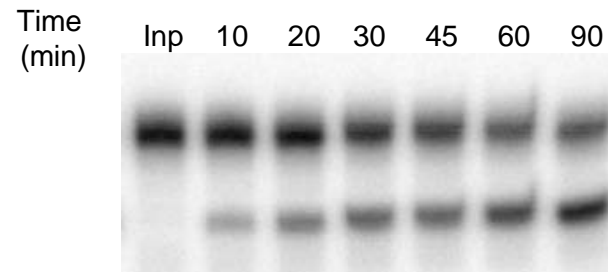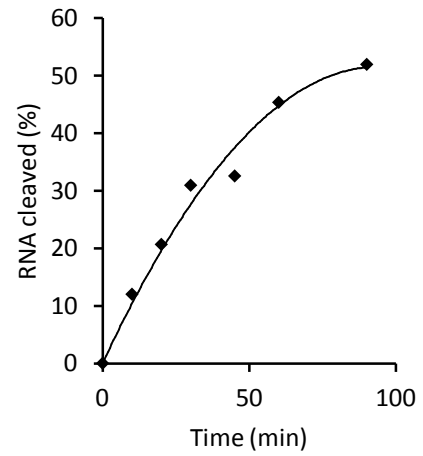

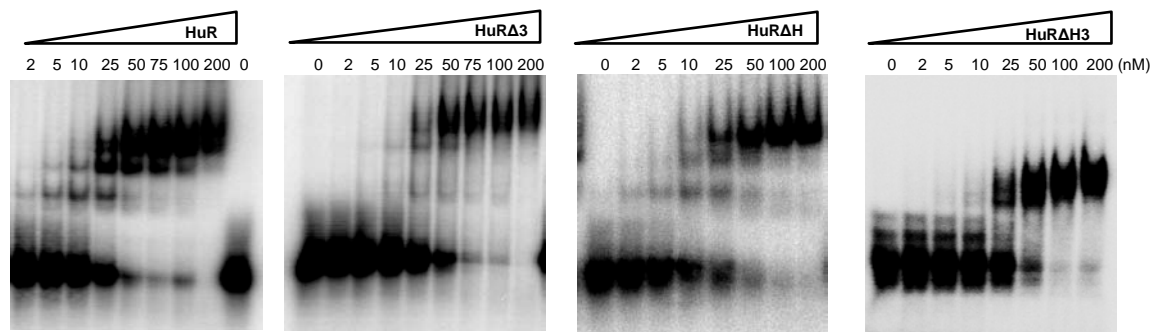

Supplementary Figure S3

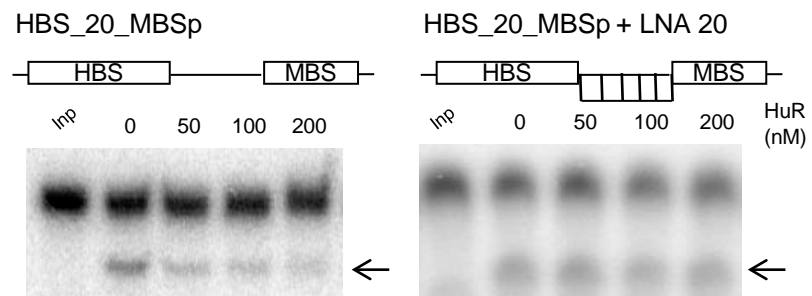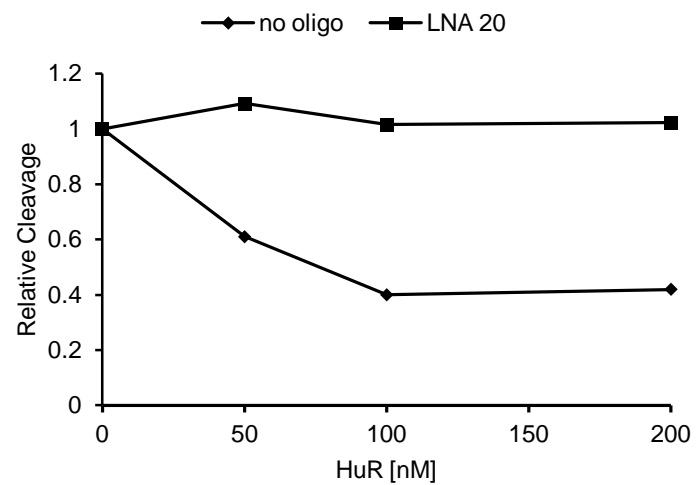

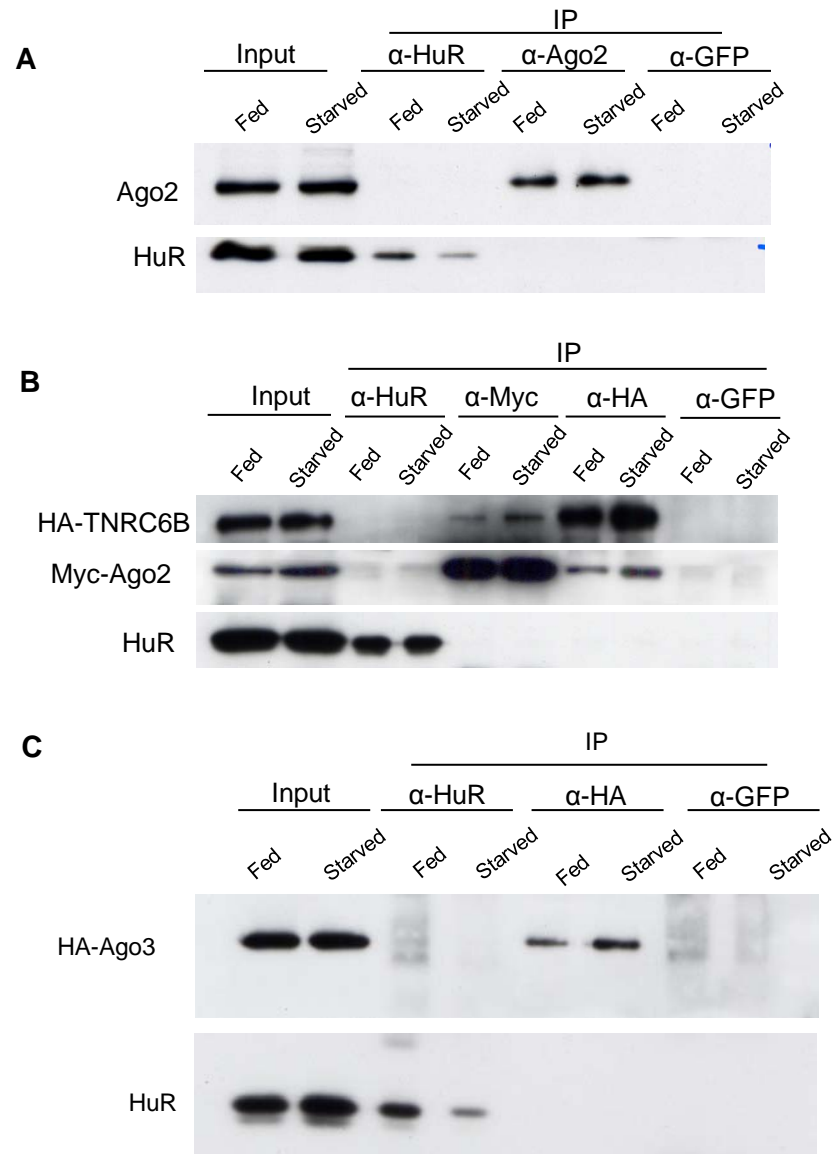

Supplement: supp_gks148_nar-00066-c-2012-File002.pdf [file supp_gks148_nar-00066-c-2012-File002.pdf]
